# Supplementary material
Source: publisher figshare collection journal article supplement (https://tandf.figshare.com/ndownloader/files/14162567)
Supplement: Supplementary file 1 [file 14162567]

**Supplementary Table 1.** The proportion of patients with a faecal calprotectin (FC) level above 50 g/g in patients referred for colonoscopy (n=590) for different drugs and common colonoscopy findings. The presence of diverticulosis, haemorrhoids and benign polyps were considered as a normal finding on colonoscopy.

| **Variable** | **The proportion of patients with a FC > 50 µg/g**  **%** | **p-value** | **Median FC value**  **(25th-75th percentile)** |
| --- | --- | --- | --- |
| All patients (n=590) | 36 | NA | 31 (20-85) |
| Female (n=317) | 34 | 0.376 | 30 (20-92) |
| Male (n=274) | 38 | 0.376 | 31 (20-82) |
| Age > 65 years (n=259) | 51 | <0.001 | 53 (22-124) |
| Diverticulosis (n=226) | 41 | 0.026 | 36 (20-101) |
| Haemorrhoids (n=91) | 35 | 0.926 | 30 (20-69) |
| Hyperplastic polyps (n=72) | 43 | 0.158 | 34 (20-78) |
| Acetylsalicylic acid (n=117) | 60 | <0.001 | 69 (28-133) |
| Clopidogrel (n=12) | 41 | 0.642 | 29 (20-173) |
| Dipyridamole (n=11) | 63 | 0.048 | 63 (29-163) |
| Warfarin (n=14) | 28 | 0.589 | 30 (22-60) |
| Non-steroidal anti-inflammatory drugs (n=48) | 56 | 0.002 | 70 (26-132) |
| Tramadol (n=32) | 44 | 0.309 | 47 (20-114) |
| Paracetamol (n=95) | 45 | 0.035 | 43 (20-114) |
| Codeine (n=13) | 23 | 0.345 | 20 (20-56) |
| Loperamide (n=13) | 54 | 0.161 | 65 (26-148) |
| Proton pump inhibitors (n=125) | 62 | <0.001 | 75 (30-140) |
| Drugs for obstipation (n=31) | 55 | 0.02 | 77 (21-146) |
| Drugs for irritable bowel syndrome (n=38) | 58 | 0.003 | 75 (30-122) |
| Prednisolone (n=31) | 55 | 0.02 | 74 (28-198) |
| Peroral iron supplements (n=26) | 65 | 0.001 | 90 (24-190) |
| B-vitamins (n=78) | 49 | 0.008 | 48 (21 -148) |
| Calcium and D-vitamins (n=63) | 46 | 0.060 | 44 (20-144) |
| Magnesium (n=13) | 31 | 0.724 | 33 (20-68) |
| Nitroglycerin (n=33) | 73 | <0.001 | 110 (38-184) |
| Beta blockers (n=122) | 49 | <0.001 | 48 (22-134) |
| Calcium channel inhibitors (n=100) | 48 | 0.004 | 42 (20-131) |
| Angiotensin-converting-enzyme inhibitors (n=78) | 47 | 0.017 | 40 (20-101) |
| Angiotensin II receptor blockers (n=95) | 39 | 0.427 | 33 (20-107) |
| Diuretics (n=115) | 48 | 0.002 | 38(20-144) |
| Metformin (n=40) | 45 | 0.182 | 38 (24-123) |
| Insulin (n=18) | 56 | 0.71 | 60 (27-130) |
| Simvastatin (n=90) | 48 | 0.008 | 44 (20-121) |
| Atorvastatin (n=22) | 54 | 0.055 | 56 (20-162) |
| Levothyroxine (n=52) | 27 | 0.187 | 27 (20-60) |
| Alendronate (n=14) | 36 | 0.979 | 24 (20-126) |
| Inhalation Steroids (n=60) | 53 | 0.006 | 53 (26-131) |
| Inhalation beta 2 receptor agonists (n=53) | 49 | 0.030 | 47 (22-128) |
| Selective serotonin-reuptake-inhibitors (n=39) | 41 | 0.456 | 47 (20-126) |
| Serotonin norepinephrine reuptake inhibitors (n=15) | 20 | 0.204 | 31 (21-48) |
| Antidepressant (n=17) | 41 | 0.624 | 44 (20-132) |
| Gabapentin (n=12) | 67 | 0.023 | 88 (40-113) |
| Neuroleptics (n=11) | 36 | 0.952 | 23 (20-125) |
| Drugs for Insomnia (n=60) | 38 | 0.629 | 34 (20-96) |
| Benzodiazepines (n=20) | 40 | 0.670 | 40 (21-115) |
| The use of four or more drugs (n=263) | 49 | <0.001 | 48 (21-124) |

Statistics: Chi2 test using the variable (yes/no) and FC above 50 g/g (yes/no).
